# Supplementary material
Source: publisher site journal article supplement (https://www.spandidos-publications.com/6533/downloadSupplementary)
Supplement: Supplementary file 1 [file downloadSupplementary]

## Sheet: Table SII
Table SII. Multivariate Cox regression analysis of the effect of KMT2C on overall survival in pan-cancer
ACC			BLCA			BRCA
	P-value	HR (95% CI)		P-value	HR (95% CI)		P-value	HR (95% CI)
Age group	0.15	0.58 (0.27-1.2)	Age group	0.008	0.67 (0.49-0.9)	Age group	0.00066	0.57 (0.41-0.79)
Sex	0.91	0.96 (0.45-2.1)	Sex	0.39	0.87 (0.62-1.2)	Sex	0.81	0.78 (0.11-5.6)
KMT2C	0.89	1.1 (0.5-2.2)	KMT2C	0.78	0.96 (0.71-1.3)	KMT2C	0.6	1.1 (0.79-1.5)
CESC			CHOL			COAD
	P-value	HR (95% CI)		P-value	HR (95% CI)		P-value	HR (95% CI)
Age group	0.58	0.87 (0.55-1.4)	Age group	0.37	0.62 (0.22-1.8)	Age group	0.039	0.64 (0.42-0.98)
Sex	NA	NA (NA-NA)	Sex	0.4	1.6 (0.55-4.4)	Sex	0.73	1.1 (0.71-1.6)
KMT2C	0.58	0.87 (0.55-1.4)	KMT2C	0.32	1.7 (0.59-4.9)	KMT2C	0.21	0.77 (0.51-1.2)
DLBC			ESCA			GBM
	P-value	HR (95% CI)		P-value	HR (95% CI)		P-value	HR (95% CI)
Age group	0.69	0.75 (0.18-3.1)	Age group	0.38	1.3 (0.75-2.1)	Age group	0.039	0.69 (0.48-0.98)
Sex	0.87	1.1 (0.26-4.8)	Sex	0.11	2.1 (0.84-5.3)	Sex	0.67	0.92 (0.63-1.3)
KMT2C	0.19	0.37 (0.081-1.6)	KMT2C	0.39	1.2 (0.75-2.1)	KMT2C	0.29	1.2 (0.85-1.7)
HNSC			KICH			KIRC
	P-value	HR (95% CI)		P-value	HR (95% CI)		P-value	HR (95% CI)
Age group	0.12	0.8 (0.61-1.1)	Age group	0.11	0.26 (0.05-1.4)	Age group	0.0024	0.61 (0.45-0.84)
Sex	0.12	0.79 (0.59-1.1)	Sex	1	1 (0.23-4.3)	Sex	0.9	0.98 (0.71-1.3)
KMT2C	0.016	1.4 (1.1-1.8)	KMT2C	0.8	0.84 (0.22-3.2)	KMT2C	0.0039	1.6 (1.2-2.2)
KIRP			LAML			LGG
	P-value	HR (95% CI)		P-value	HR (95% CI)		P-value	HR (95% CI)
Age group	0.52	0.82 (0.45-1.5)	Age group	0.00024	0.42 (0.26-0.67)	Age group	3.5e-09	0.31 (0.21-0.46)
Sex	0.11	0.59 (0.3-1.1)	Sex	0.29	0.78 (0.5-1.2)	Sex	0.66	1.1 (0.76-1.5)
KMT2C	0.76	1.1 (0.6-2)	KMT2C	0.15	1.4 (0.89-2.2)	KMT2C	0.83	1 (0.73-1.5)
LIHC			LUAD			LUSC
	P-value	HR (95% CI)		P-value	HR (95% CI)		P-value	HR (95% CI)
Age group	0.45	0.87 (0.61-1.2)	Age group	0.18	0.82 (0.61-1.1)	Age group	0.31	0.87 (0.65-1.1)
Sex	0.37	0.84 (0.58-1.2)	Sex	0.42	1.1 (0.84-1.5)	Sex	0.18	1.3 (0.9-1.8)
KMT2C	0.59	0.91 (0.63-1.3)	KMT2C	0.039	1.4 (1-1.9)	KMT2C	0.15	1.2 (0.93-1.6)
MESO			OV			PAAD
	P-value	HR (95% CI)		P-value	HR (95% CI)		P-value	HR (95% CI)
Age group	0.23	0.75 (0.46-1.2)	Age group	0.036	0.75 (0.58-0.98)	Age group	0.11	0.71 (0.47-1.1)
Sex	0.66	0.87 (0.47-1.6)	Sex	NA	NA (NA-NA)	Sex	0.2	0.76 (0.5-1.2)
KMT2C	0.23	0.74 (0.46-1.2)	KMT2C	0.14	0.82 (0.63-1.1)	KMT2C	0.89	0.97 (0.64-1.5)
PCPG			PRAD			READ
	P-value	HR (95% CI)		P-value	HR (95% CI)		P-value	HR (95% CI)
Age group	0.69	0.72 (0.14-3.7)	Age group	0.89	0.92 (0.28-3.1)	Age group	0.0013	0.2 (0.075-0.54)
Sex	0.2	3.2 (0.54-19)	Sex	NA	NA (NA-NA)	Sex	0.38	0.71 (0.33-1.5)
KMT2C	0.19	0.23 (0.026-2.1)	KMT2C	0.071	0.3 (0.08-1.1)	KMT2C	0.63	1.2 (0.56-2.6)
SARC			SKCM			STAD
	P-value	HR (95% CI)		P-value	HR (95% CI)		P-value	HR (95% CI)
Age group	0.2	0.77 (0.51-1.2)	Age group	0.00039	0.61 (0.46-0.8)	Age group	0.03	0.69 (0.5-0.96)
Sex	0.43	0.84 (0.56-1.3)	Sex	0.38	1.1 (0.86-1.5)	Sex	0.16	1.3 (0.9-1.9)
KMT2C	0.84	0.96 (0.63-1.4)	KMT2C	0.93	0.99 (0.76-1.3)	KMT2C	0.85	0.97 (0.7-1.3)
TGCT			THCA			THYM
	P-value	HR (95% CI)		P-value	HR (95% CI)		P-value	HR (95% CI)
Age group	1	4.8e+08 (0-Inf)	Age group	1	1.1e-09 (0-Inf)	Age group	0.074	0.24 (0.049-1.2)
Sex	NA	NA (NA-NA)	Sex	0.19	2 (0.71-5.8)	Sex	0.43	0.58 (0.15-2.2)
KMT2C	0.43	0.36 (0.03-4.4)	KMT2C	0.11	0.43 (0.15-1.2)	KMT2C	0.59	1.4 (0.38-5.4)
UCEC			UCS			GBM
	P-value	HR (95% CI)		P-value	HR (95% CI)		P-value	HR (95% CI)
Age group	0.017	0.6 (0.39-0.91)	Age group	0.66	0.85 (0.42-1.7)	Age group	0.1	0.49 (0.21-1.2)
Sex	NA	NA (NA-NA)	Sex	NA	NA (NA-NA)	Sex	0.46	1.4 (0.58-3.4)
KMT2C	0.55	1.1 (0.75-1.7)	KMT2C	0.72	0.88 (0.43-1.8)	KMT2C	0.95	1 (0.44-2.4)
HR, hazard ratio; CI, confidence interval; KMT2C, histone lysine N-methyltransferase 2C; NA, not applicable.
